# Supplementary material for: Field Evaluation of Low-Cost Particulate Matter Sensors for Measuring Wildfire Smoke
Source: PubMed Central journal article supplement (PMC7506753; doi:10.3390/s20174796), 2020-08-25
Supplement: sensors-20-04796-s001.pdf [file sensors-20-04796-s001.pdf]

*Supplemental Information*

## **Field evaluation of Low-Cost Particulate Matter Sensors for Measuring Wildfire Smoke**

**Amara L. Holder<sup>1\*</sup>, Anna K. Mebust<sup>2</sup>, Lauren A. Maghran<sup>2</sup>, Michael R. McGown<sup>3</sup>, Kathleen E. Stewart<sup>2</sup>, Dena M. Vallano<sup>2</sup>, Robert A. Elleman<sup>3</sup>, Kirk R. Baker<sup>4</sup>**

<sup>1</sup> US Environmental Protection Agency, Office of Research and Development; [holder.amara@epa.gov](mailto:holder.amara@epa.gov)

<sup>2</sup> US Environmental Protection Agency, Region 9; [mebust.anna@epa.gov](mailto:mebust.anna@epa.gov), [maghranlauren@gmail.com](mailto:maghranlauren@gmail.com), [stewart.kathleen@epa.gov](mailto:stewart.kathleen@epa.gov), [vallano.dena@epa.gov](mailto:vallano.dena@epa.gov)

<sup>3</sup> US Environmental Protection Agency, Region 10; [mcgown.michael@epa.gov](mailto:mcgown.michael@epa.gov), [elleman.robert@epa.gov](mailto:elleman.robert@epa.gov)

<sup>4</sup> US Environmental Protection Agency, Office of Air Quality Planning and Standards; [baker.kirk@epa.gov](mailto:baker.kirk@epa.gov)

\* Correspondence: [holder.amara@epa.gov](mailto:holder.amara@epa.gov); Tel.: +1-915-541-4635

Received: 02 August 2020; Accepted: 21 August 2020; Published: date

Number of Pages: 7

Number of Figures: 3

Number of Tables: 3

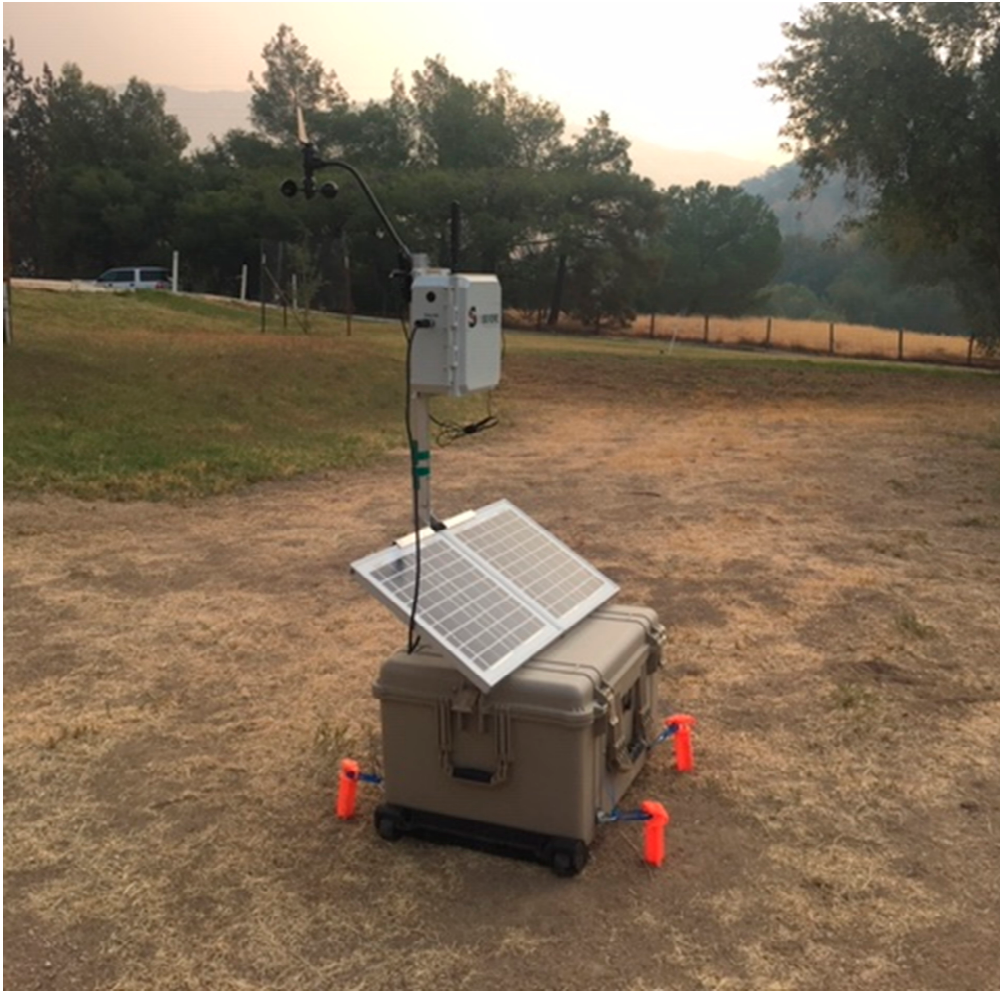

**Figure 1.** Typical sensor package setup.

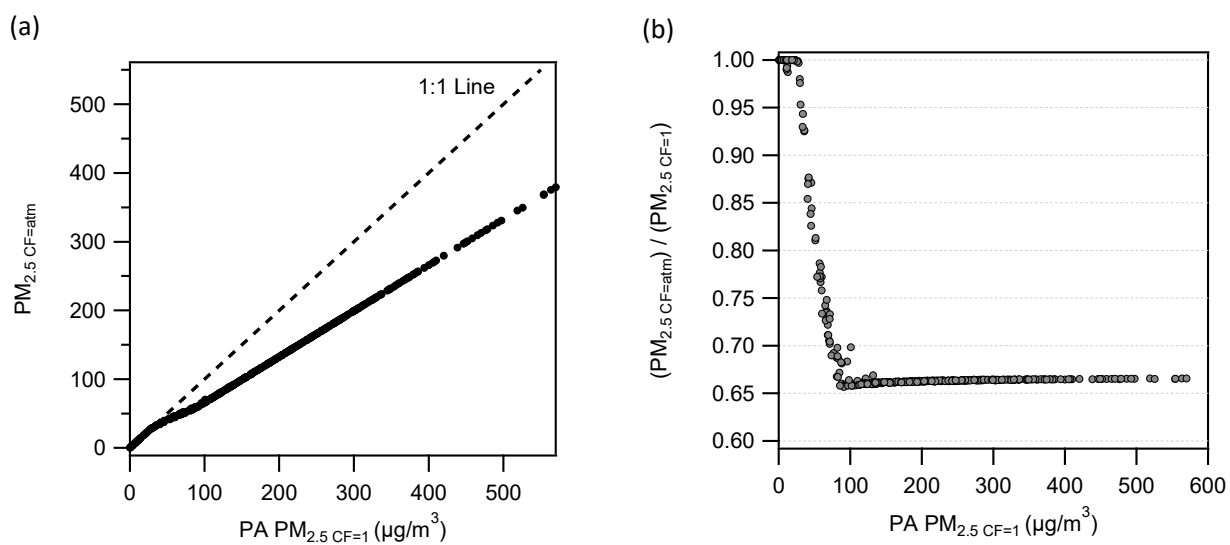

**Figure S2.** (a) Scatter plot of CF=atm to CF = 1 PM<sub>2.5</sub> concentrations and (b) ratio of the CF = atm to CF = 1 vs PM<sub>2.5</sub> concentrations vs PM<sub>2.5</sub> CF = 1 concentration at the Natchez fire.

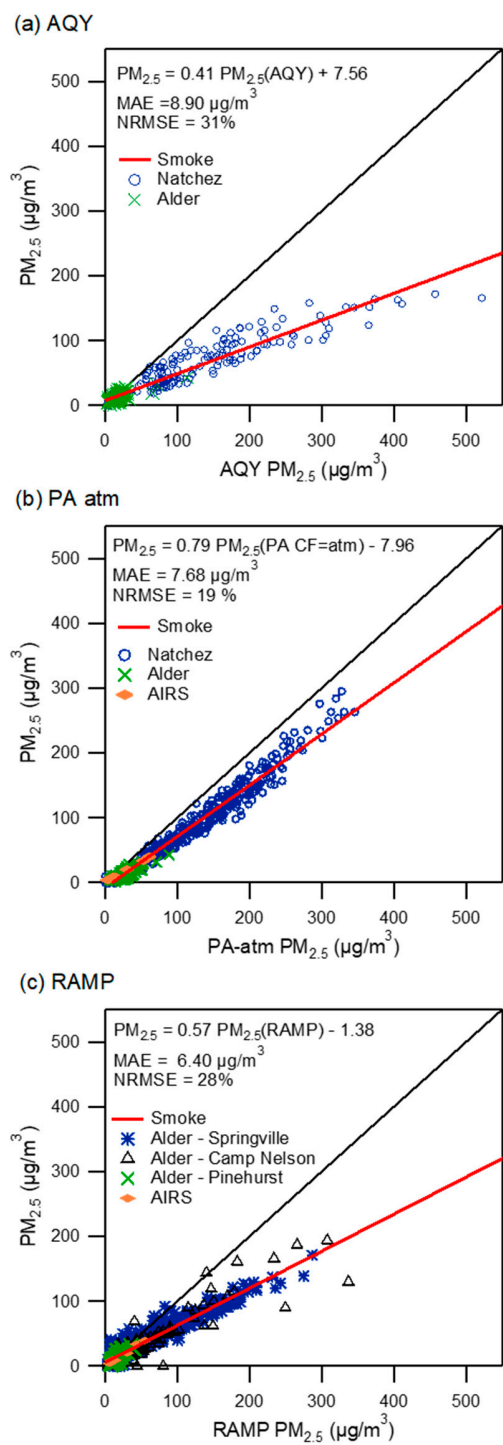

**Figure S3.** Overlaid scatter plot of smoke impacted datasets with the linear fit smoke calibration and the resulting MAE and NRMSE for the calibration adjusted data for (a) AQY (b) PA and (c) RAMP.

**Table 1.** Selected sensor manufacturers, models, and measured parameters.

| <b>Sensor Manufacturer</b> | <b>Model</b>                                        | <b>Pollutant Capability</b>                            | <b>PM Sensor Model</b> | <b>Additional Measurements</b>                           |
|----------------------------|-----------------------------------------------------|--------------------------------------------------------|------------------------|----------------------------------------------------------|
| SenSevere                  | Real Time Affordable Multi-Pollutant Monitor (RAMP) | PM <sub>2.5</sub> , CO, CO <sub>2</sub>                | Plantower PMS5003      | Relative Humidity<br>Temperature<br>Wind speed/direction |
| Aeroqual                   | Micro air quality station (AQY)                     | PM <sub>2.5</sub> , NO <sub>2</sub> , O <sub>3</sub>   | Novafitness SDS011     | Relative Humidity<br>Temperature                         |
| PurpleAir                  | PA-IISD (PA)                                        | PM <sub>1</sub> , PM <sub>2.5</sub> , PM <sub>10</sub> | Plantower PMS5003      | Relative Humidity<br>Temperature<br>Pressure             |

**Table S2.** Reference mean ( $\mu$ ), standard deviation ( $\sigma$ ), minimum value (min), and maximum value (max) for fine particulate matter (PM<sub>2.5</sub>) concentrations and temperature (T) and relative humidity (RH) at each deployment location

| Deployment                | PM <sub>2.5</sub> ( $\mu\text{g}/\text{m}^3$ ) |          |     |       | T ( $^{\circ}\text{C}$ ) |          |      |      | RH (%) |          |      |       |
|---------------------------|------------------------------------------------|----------|-----|-------|--------------------------|----------|------|------|--------|----------|------|-------|
|                           | $\mu$                                          | $\sigma$ | Min | Max   | $\mu$                    | $\sigma$ | Min  | Max  | $\mu$  | $\sigma$ | Min  | Max   |
| AIRS ambient              | 7.7                                            | 4.3      | 0.5 | 102.6 | 19.1                     | 8.4      | -4.5 | 33.7 | 80.0   | 17.6     | 23.4 | 100   |
| AIRS Prescribed Fire      | 16.4                                           | 16.7     | 3.6 | 51.6  | 26.28                    | 1.4      | 20.7 | 26.3 | 41.6   | 5.2      | 34   | 53    |
| Natchez Fire              | 86.4                                           | 62.8     | 0   | 295   |                          |          |      |      |        |          |      |       |
| Bald Mt./ Pole Creek Fire | 3.4                                            | 3.0      | 0   | 9     | 19.0                     | 7.2      | 5.6  | 32.1 | 20.3   | 9.3      | 5    | 48    |
| Alder Fire/ Springville   | 35.2                                           | 28.4     | -5  | 291   | 11.7                     | 5.1      | 2.7  | 22.6 | 46.9   | 22.3     | 12.3 | 100.2 |
| Alder Fire/ Pinehurst     | 13.0                                           | 6.6      | 2   | 43    | 15.5                     | 4.3      | 10   | 24.4 | 40.1   | 8.8      | 18.5 | 62    |

**Table S3.** Linear regression parameters<sup>a</sup> for sensor correction and adjusted R<sup>2</sup> developed from AIRS ambient evaluation.

| Sensor                    | C     | $\beta$ | $\beta_T$ | $\beta_{RH}$ | Adjusted R <sup>2</sup> |
|---------------------------|-------|---------|-----------|--------------|-------------------------|
| AQY                       | 4.45  | 0.65    |           |              | 0.48                    |
|                           | 6.81  | 0.71    | -0.127    |              | 0.54                    |
|                           | -2.35 | 0.67    |           | 0.083        | 0.64                    |
|                           | -1.71 | 0.70    | -0.038    | 0.081        | 0.64                    |
| PA (CF =<br>atm<br>Lower) | 1.74  | 0.53    |           |              | 0.86                    |
|                           | 2.08  | 0.54    | -0.030    |              | 0.87                    |
|                           | 0.44  | 0.52    |           | 0.020        | 0.87                    |
|                           | 0.80  | 0.52    | -0.027    | 0.020        | 0.88                    |
| PA (CF=1<br>Higher)       | 1.79  | 0.53    |           |              | 0.86                    |
|                           | 2.26  | 0.54    | -0.042    |              | 0.86                    |
|                           | 0.43  | 0.51    |           | 0.021        | 0.87                    |
|                           | 0.93  | 0.52    | -0.038    | 0.020        | 0.88                    |
| RAMP                      | -1.38 | 0.97    |           |              | 0.85                    |
|                           | -0.94 | 1.03    | -0.076    |              | 0.88                    |
|                           | -3.16 | 0.94    |           | 0.032        | 0.88                    |
|                           | -2.54 | 0.98    | -0.054    | 0.026        | 0.90                    |

<sup>a</sup>  $PM_{2.5} = C + \beta$  sensor  $PM_{2.5} + \beta_T$  sensor T +  $\beta_{RH}$  sensor RH
